# Supplementary material for: Population Substructure and Control Selection in Genome-Wide Association Studies
Source: PLoS One. 2008 Jul 2;3(7):e2551. doi: 10.1371/journal.pone.0002551 (PMC2432498; doi:10.1371/journal.pone.0002551)
Supplement: Table S1 — Power comparison between the association tests with and without population substructure adjustment (0.03 MB DOC) [file pone.0002551.s002.doc]

**Table S1. Power comparison between the association tests with and without population substructure adjustment**

| (*f*1, *f*2) a | Unadjustedb | Adjustedc |
| --- | --- | --- |
| (0.1, 0.9) | 0.63 | 0.43 |
| (0.1, 0.7) | 0.78 | 0.64 |
| (0.1, 0.5) | 0.75 | 0.68 |
| (0.1, 0.3) | 0.66 | 0.64 |
| (0.1, 0.1) | 0.45 | 0.45 |

Note: The simulation experiment is described in Text S1. The significant level is 0.05.

aValues for *f*1, the probability of being exposed to the environment risk, and for *f*2, the probability of having at least one copy of the disease risk allele, for a subject from subpopulation I. These values are reversed for subpopulation II.

bThe association test based on the Wald statistic derived from the logistic regression model adjusting for the environment risk factor.

cThe association test based on the Wald statistic derived from the logistic regression model adjusting for both environment risk factor and population substructure.
