# Supplementary material for: Population Substructure and Control Selection in Genome-Wide Association Studies
Source: PLoS One. 2008 Jul 2;3(7):e2551. doi: 10.1371/journal.pone.0002551 (PMC2432498; doi:10.1371/journal.pone.0002551)
Supplement: Table S3 — Tracy-Widom tests and associated P-values (in parenthesis) for the significance of principal components based on 7,017 structure inference SNPs (0.03 MB DOC) [file pone.0002551.s004.doc]

**Table S3. Tracy-Widom tests and associated P-values (in parenthesis) for the significance of principal components based on 7,017 structure inference SNPs**

|  | PLCOca-PLCOcoa | PLCOca-NHScob | NHSca-NHScoc | NHSca-PLCOcod |
| --- | --- | --- | --- | --- |
| PC #1 | 277.99 (<10-7) | 311.50 (<10-7) | 444.95 (<10-7) | 413.99 (<10-7) |
| PC #2 | 86.68 (<10-7) | 100.58 (<10-7) | 72.42 (<10-7) | 60.24 (<10-7) |
| PC #3 | 0.17 (0.139) | -0.36 (0.243) | 11.10 (<10-7) | 14.92 (<10-7) |
| PC #4 | -1.49 (0.571) | -1.48 (0.567) | -1.98 (0.720) | -0.34 (0.238) |
| PC #5 | -4.78 (0.999) | -3.27 (0.958) | -3.02 (0.933) | -3.30 (0.961) |

aPLCOca-PLCOco is the original PLCO prostate cancer study.

bPLCOca-NHSco is the reconstructed study with prostate cancer cases from the PLCO, and external controls from NHS.

cNHSca-NHSco is the original NHS breast cancer study.

dNHSca-PLCOco is the reconstructed study with breast cancer cases from the NHS, and external controls from PLCO.
